# Supplementary material for: Modulation of Multidrug Resistance Gene Expression by Coumarin Derivatives in Human Leukemic Cells
Source: PubMed Central journal article supplement (PMC5745744; doi:10.1155/2017/5647281), 2017-12-13
Supplement: 5647281.f1.pdf [file 5647281.f1.pdf]

# Amplification Plot

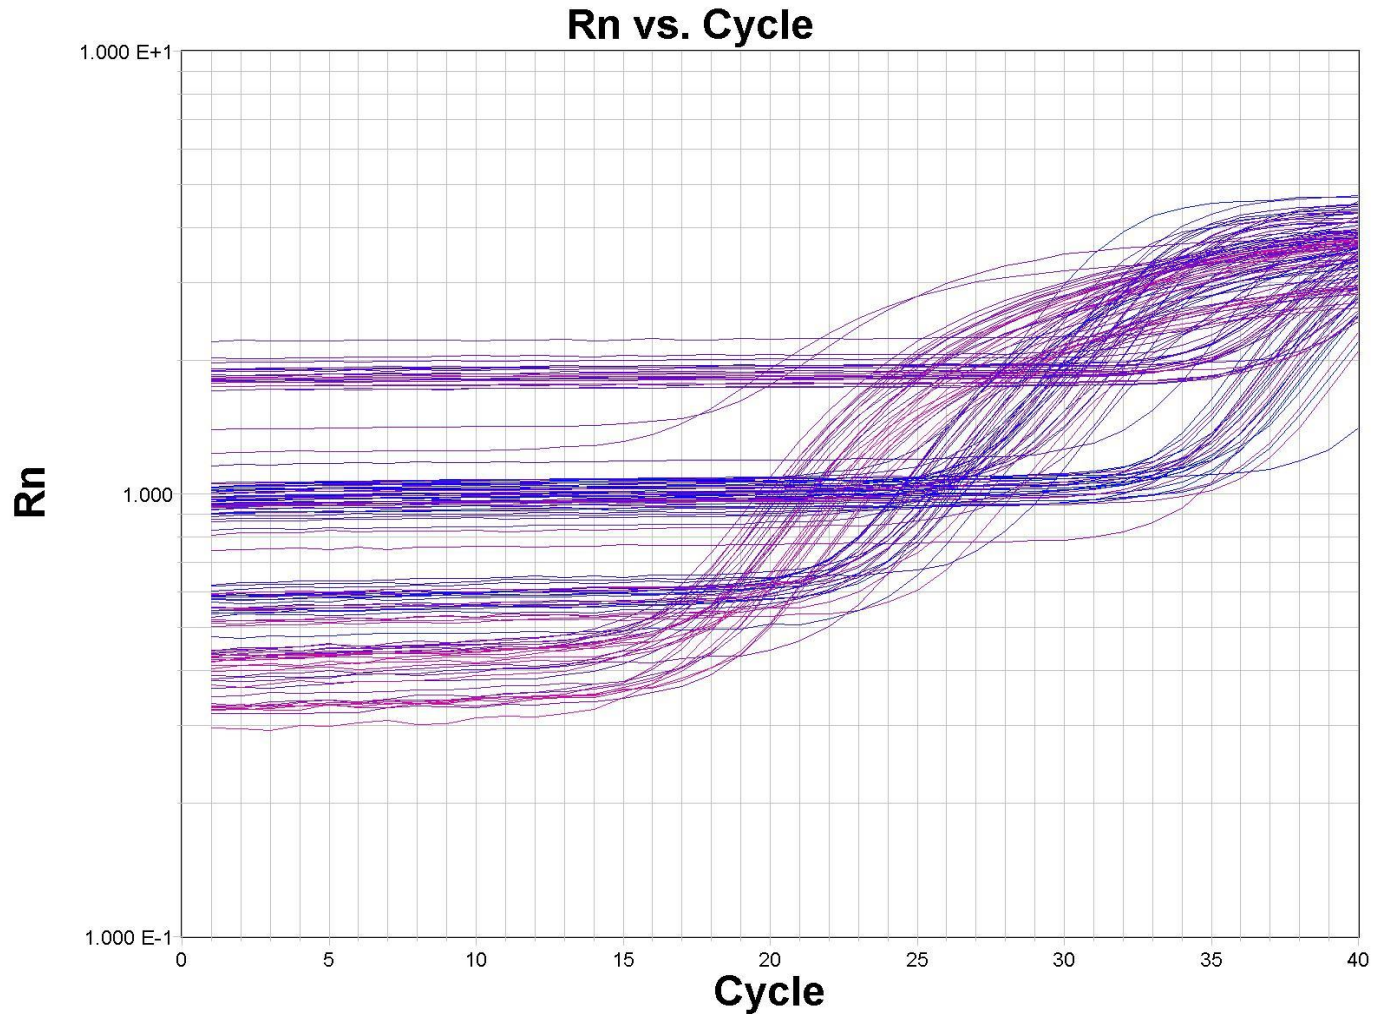

# Coumarin+M, CEM/C1

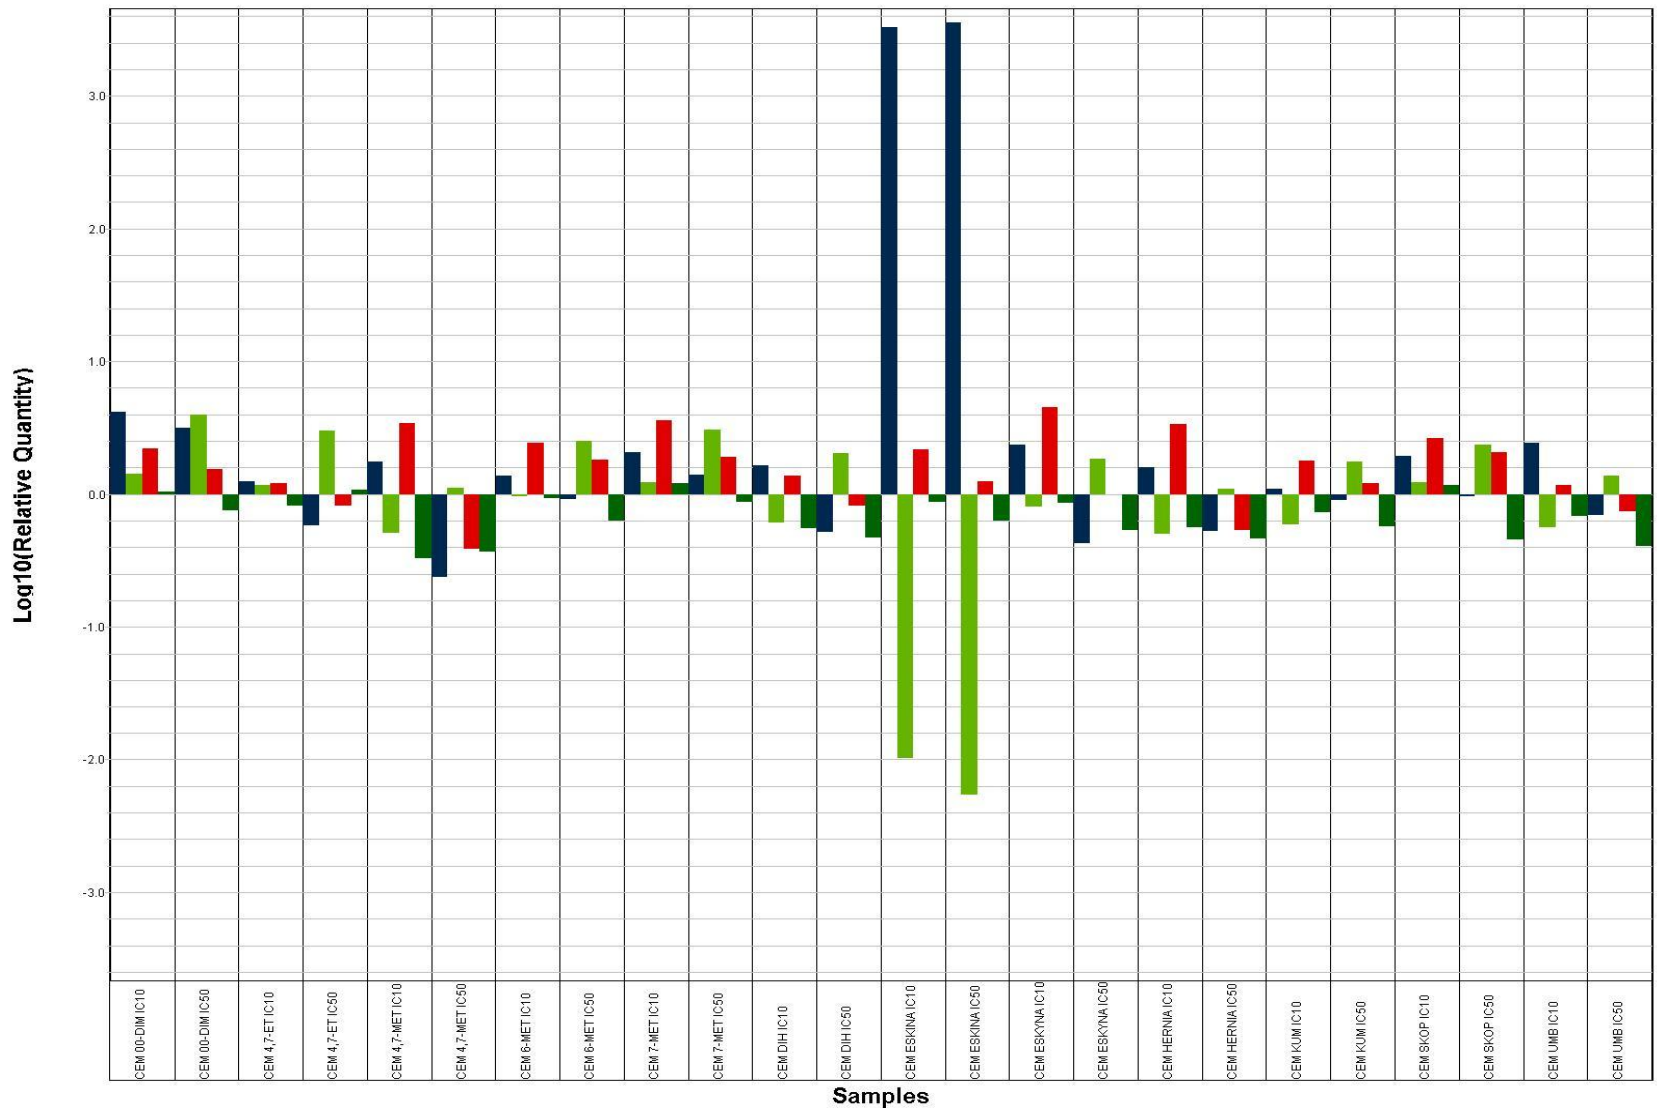

# Coumarin+M, CEM/C1

Study Name : Coumarin + M, CEM/C1.sdm  
Software Version : RQ Manager 1.2  
Number of Plates in Study : 9  
User :  
Comments :
